# Supplementary material for: Single Origin Coffee Aroma: From Optimized Flavor Protocols and Coffee Customization to Instrumental Volatile Characterization and Chemometrics
Source: MDPI journal article supplement (doi:10.3390/molecules26154609), 2021-07-29
Supplement: s1 [file s1]

# Single Origin Coffee Aroma: From Optimized Flavor Protocols and Coffee Customization to Instrumental Volatile Characterization and Chemometrics

Panagiota Zakidou <sup>1</sup>, Fotini Plati <sup>1</sup>, Anthia Matsakidou <sup>1</sup>, Evdoxia-Maria Varka <sup>2</sup>, Georgios Blekas <sup>1</sup> and Adamantini Paraskevopoulou <sup>1,\*</sup>

<sup>1</sup>Laboratory of Food Chemistry and Technology, School of Chemistry, Aristotle University of Thessaloniki, 54124 Thessaloniki, Greece

<sup>2</sup>AVEK S.A., Naupliou 10-14, Metamorphosi, 14452 Athens, Greece

\* Correspondence: adparask@chem.auth.gr

## Supplementary Material

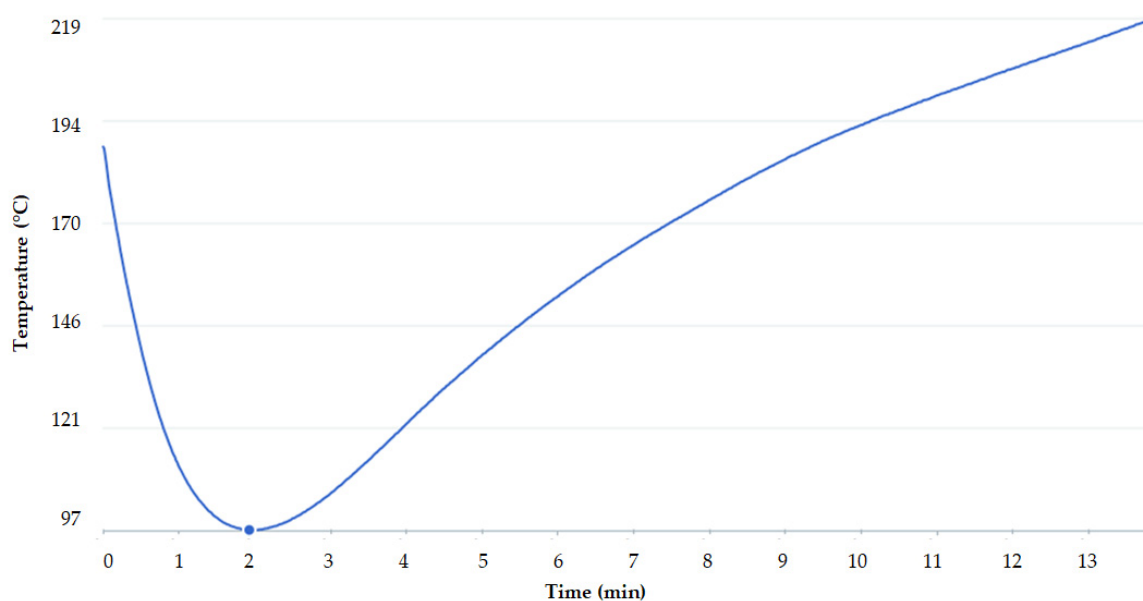

**Figure S1:** Typical time-temperature roasting curve
